# Supplementary material for: Identification of Subtype Specific miRNA-mRNA Functional Regulatory Modules in Matched miRNA-mRNA Expression Data: Multiple Myeloma as a Case
Source: Biomed Res Int. 2015 Mar 19;2015:501262. doi: 10.1155/2015/501262 (PMC4385567; doi:10.1155/2015/501262)
Supplement: Supplementary file 1 — Figure S1. Schematic representation of a co-module. The expression values of miRNAs and mRNAs were indicated by a color code ranging from green (under-expressed) to red (over-expressed). Note that in this co-module, two samples of t(4;14) exhibited similar profiles, whereas the sample of t(14;16) exhibited an inverse profile. Figure S2. Distribution of the number of MFRMs extracted from each co-module. Table S1. 72 MM associated genes from OMIM, CGP and GAD. Table S2. 63 MM associated GO biological processes. Table S3. The top 15 miRNAs and 50 mRNAs frequently included in each kind of subtype specific MFRM. [file 501262.f1.zip › 501262.f1/Table S1 72 MM associated genes.xls]

## Sheet: Sheet1
Table S1. 72 known genes associated with MM.
ENSG00000147050
ENSG00000068078
ENSG00000109685
ENSG00000204103
ENSG00000137265
ENSG00000178573
ENSG00000112576
ENSG00000123080
ENSG00000213281
ENSG00000085563
ENSG00000117877
ENSG00000182871
ENSG00000163599
ENSG00000140465
ENSG00000160868
ENSG00000106258
ENSG00000012061
ENSG00000104884
ENSG00000143226
ENSG00000134184
ENSG00000084207
ENSG00000184674
ENSG00000196126
ENSG00000206240
ENSG00000229074
ENSG00000206306
ENSG00000236884
ENSG00000228080
ENSG00000017427
ENSG00000140443
ENSG00000146678
ENSG00000115457
ENSG00000146674
ENSG00000136634
ENSG00000125538
ENSG00000077238
ENSG00000136244
ENSG00000160712
ENSG00000134352
ENSG00000169047
ENSG00000185950
ENSG00000226979
ENSG00000226275
ENSG00000230279
ENSG00000223919
ENSG00000238130
ENSG00000231408
ENSG00000173503
ENSG00000177000
ENSG00000116984
ENSG00000124275
ENSG00000171428
ENSG00000156006
ENSG00000109320
ENSG00000100906
ENSG00000089041
ENSG00000005421
ENSG00000132170
ENSG00000104881
ENSG00000073756
ENSG00000232810
ENSG00000228978
ENSG00000223952
ENSG00000230108
ENSG00000228321
ENSG00000228849
ENSG00000204490
ENSG00000206439
ENSG00000176890
ENSG00000126215
ENSG00000005381
ENSG00000174405
