# Supplementary material for: Identification of Subtype Specific miRNA-mRNA Functional Regulatory Modules in Matched miRNA-mRNA Expression Data: Multiple Myeloma as a Case
Source: Biomed Res Int. 2015 Mar 19;2015:501262. doi: 10.1155/2015/501262 (PMC4385567; doi:10.1155/2015/501262)
Supplement: Supplementary file 1 — Figure S1. Schematic representation of a co-module. The expression values of miRNAs and mRNAs were indicated by a color code ranging from green (under-expressed) to red (over-expressed). Note that in this co-module, two samples of t(4;14) exhibited similar profiles, whereas the sample of t(14;16) exhibited an inverse profile. Figure S2. Distribution of the number of MFRMs extracted from each co-module. Table S1. 72 MM associated genes from OMIM, CGP and GAD. Table S2. 63 MM associated GO biological processes. Table S3. The top 15 miRNAs and 50 mRNAs frequently included in each kind of subtype specific MFRM. [file 501262.f1.zip › 501262.f1/Table S2 MM associated GO terms.xls]

## Sheet: Sheet1
Table S2. The biological process GO terms associated with MM
GO:0001775	cell activation
GO:0002036	regulation of L-glutamate transport
GO:0002037	negative regulation of L-glutamate transport
GO:0002376	immune system process
GO:0002377	immunoglobulin production
GO:0002520	immune system development
GO:0002521	leukocyte differentiation
GO:0006915	apoptosis
GO:0006916	anti-apoptosis
GO:0006955	immune response
GO:0007275	multicellular organismal development
GO:0008219	cell death
GO:0008283	cell proliferation
GO:0008285	negative regulation of cell proliferation
GO:0009086	methionine biosynthetic process
GO:0009891	positive regulation of biosynthetic process
GO:0009893	positive regulation of metabolic process
GO:0012501	programmed cell death
GO:0016265	death
GO:0030097	hemopoiesis
GO:0030154	cell differentiation
GO:0031325	positive regulation of cellular metabolic process
GO:0031328	positive regulation of cellular biosynthetic process
GO:0032502	developmental process
GO:0042127	regulation of cell proliferation
GO:0042221	response to chemical stimulus
GO:0042981	regulation of apoptosis
GO:0043066	negative regulation of apoptosis
GO:0043067	regulation of programmed cell death
GO:0043069	negative regulation of programmed cell death
GO:0043523	regulation of neuron apoptosis
GO:0043525	positive regulation of neuron apoptosis
GO:0045595	regulation of cell differentiation
GO:0045727	positive regulation of translation
GO:0045787	positive regulation of cell cycle
GO:0045941	positive regulation of transcription, DNA-dependent
GO:0046323	glucose import
GO:0046324	regulation of glucose import
GO:0046325	negative regulation of glucose import
GO:0048009	insulin-like growth factor receptor signaling pathway
GO:0048468	cell development
GO:0048513	organ development
GO:0048518	positive regulation of biological process
GO:0048519	negative regulation of biological process
GO:0048522	positive regulation of cellular process
GO:0048523	negative regulation of cellular process
GO:0048534	hemopoietic or lymphoid organ development
GO:0048731	system development
GO:0048856	anatomical structure development
GO:0048869	cellular developmental process
GO:0050793	regulation of developmental process
GO:0050804	regulation of synaptic transmission
GO:0050806	positive regulation of synaptic transmission
GO:0050896	response to stimulus
GO:0051051	negative regulation of transport
GO:0051223	regulation of protein transport
GO:0051247	positive regulation of protein metabolic process
GO:0051402	neuron apoptosis
GO:0051952	regulation of amine transport
GO:0051953	negative regulation of amine transport
GO:0051955	regulation of amino acid transport
GO:0051956	negative regulation of amino acid transport
GO:0051969	regulation of transmission of nerve impulse
