# Supplementary material for: Identification of Subtype Specific miRNA-mRNA Functional Regulatory Modules in Matched miRNA-mRNA Expression Data: Multiple Myeloma as a Case
Source: Biomed Res Int. 2015 Mar 19;2015:501262. doi: 10.1155/2015/501262 (PMC4385567; doi:10.1155/2015/501262)
Supplement: Supplementary file 1 — Figure S1. Schematic representation of a co-module. The expression values of miRNAs and mRNAs were indicated by a color code ranging from green (under-expressed) to red (over-expressed). Note that in this co-module, two samples of t(4;14) exhibited similar profiles, whereas the sample of t(14;16) exhibited an inverse profile. Figure S2. Distribution of the number of MFRMs extracted from each co-module. Table S1. 72 MM associated genes from OMIM, CGP and GAD. Table S2. 63 MM associated GO biological processes. Table S3. The top 15 miRNAs and 50 mRNAs frequently included in each kind of subtype specific MFRM. [file 501262.f1.zip › 501262.f1/Table S3 The top 15 active miRNAs and 50 active mRNAs.xls]

## Sheet: Sheet1
Table S3. The top 15 active miRNAs and 50 active mRNAs
		Del RB	t(11;14)	t(4;14)	t(14;16)	NFISH
The top 15 active miRNAs	1	hsa-miR-324-5p	hsa-miR-587	hsa-miR-125b	hsa-miR-184	hsa-miR-196b
	2	hsa-miR-34a	hsa-miR-330	hsa-miR-551a	hsa-miR-204	hsa-miR-23a
	3	hsa-miR-338	hsa-miR-520e	hsa-miR-99a	hsa-miR-422b	hsa-miR-633
	4	hsa-miR-503	hsa-miR-186	hsa-miR-132	hsa-miR-518f	hsa-miR-221
	5	hsa-let-7e	hsa-miR-197	hsa-miR-96	hsa-miR-520f	hsa-miR-515-3p
	6	hsa-miR-542-5p	hsa-miR-30e-3p	hsa-miR-18b	hsa-miR-532	hsa-miR-196a
	7	hsa-miR-489	hsa-miR-660	hsa-miR-218	hsa-miR-566	hsa-miR-425
	8	hsa-miR-133a	hsa-miR-26a	hsa-miR-518d	hsa-let-7e	hsa-miR-485-5p
	9	hsa-miR-107	hsa-miR-362	hsa-miR-10a	hsa-miR-100	hsa-miR-517c
	10	hsa-miR-152	hsa-miR-550	hsa-miR-98	hsa-miR-10b	hsa-miR-555
	11	hsa-miR-222	hsa-miR-639	hsa-miR-125a	hsa-miR-125a	hsa-miR-575
	12	hsa-miR-518e	hsa-miR-148b	hsa-miR-361	hsa-miR-130a	hsa-miR-132
	13	hsa-miR-133b	hsa-miR-16	hsa-miR-597	hsa-miR-133b	hsa-miR-135a
	14	hsa-miR-215	hsa-miR-335	hsa-miR-100	hsa-miR-141	hsa-miR-137
	15	hsa-miR-372	hsa-miR-10a	hsa-miR-511	hsa-miR-143	hsa-miR-15a
The top 50 active mRNAs	1	CCDC50	EDEM2	IK	ICA1	LACTB2
	2	MYO9B	STC2	COPS3	PDK4	MXD1
	3	KAT5	KLHL4	HNRNPA1	EHD3	IL18RAP
	4	FNBP4	KIAA1377	NOP58	DDX11	TREM1
	5	PSMG2	RBP1	SLC44A1	RNASET2	PPT1
	6	AKAP8L	BATF3	FAM60A	SLAMF7	ACLY
	7	NXF1	KCNA5	HNRNPA1L2	APBA2	PTPRE
	8	PATL1	RAB33A	MATR3	CTNS	CCDC90B
	9	USP36	RPL36AL	DDX18	GPM6B	ALG10
	10	TRAF4	XKR3	DLD	HERPUD1	PAPD4
	11	AKAP8	HOXB2	SNRPD1	PKP2	FPR2
	12	FZR1	SHMT2	NAP1L1	ELMO2	AGXT2L2
	13	SUPT6H	FAM116B	SKIV2L2	ZNF275	ALG10B
	14	STARD3	TOMM34	ST13	TBC1D22B	FCAR
	15	UPF1	SARS	WDR77	TMEM206	SKAP2
	16	GAB2	SDF4	CBX3	FAM107B	SLC11A1
	17	DHX8	EPHA6	MKLN1	YBX1	LMAN1
	18	ADNP2	ERP29	SLTM	KLF6	SLC25A40
	19	CLASRP	SAMM50	ATG3	TTC7A	MARK3
	20	MLLT6	FCER2	RPS3A	TGFBR3	TAF9
	21	EIF1B	LIMK1	NONO	SPTB	CBX5
	22	INO80D	CCND1	GMPS	RHOBTB1	TH1L
	23	ILF3	IL10RA	UTP15	SIDT1	MANBAL
	24	RNF138	QPCT	HNRNPH1	SCARB1	AQP9
	25	C18orf21	FAM119B	RPL4	ATP2A3	COPS7A
	26	WDR45L	TM6SF1	SUZ12	MGLL	CRBN
	27	TLK2	VLDLR	ATP11B	BCS1L	DARS2
	28	CPSF7	C9orf150	RPL6	NUAK1	PSPC1
	29	STX5	LRWD1	PMPCB	PLXNA2	ZNF211
	30	SF1	UGT3A2	ZC3HAV1	MCAM	TNFSF10
	31	KCTD6	ADCY5	BCCIP	C12orf5	NT5C3
	32	RELA	KDELC2	MRPL3	ITGB5	C7orf49
	33	EIF1	DCC	RCN2	ERC1	EBPL
	34	YPEL2	ITPRIPL2	SENP5	WBP11	SSR1
	35	TLK2P1	MTFP1	CASD1	MYBPC2	HAT1
	36	NISCH	RGAG4	PSMA1	SRRT	ZSCAN10
	37	XAB2	RP4-539M6.19	EIF2S3	LPCAT2	FCRLA
	38	NFKBIB	FAS	UBQLN1	TFAP2C	DCLK1
	39	PIK3CA	METTL1	ADAM10	SMOX	C10orf57
	40	SLC25A26	CAPG	RSL24D1	PEBP1	RINT1
	41	TATDN2	COASY	ZMAT2	CD200	ORC3
	42	WDR82	KCNAB2	TMEM123	DFNB31	PAN2
	43	EIF1AD	RORA	MIOS	FKBP5	NUPL2
	44	PPTC7	HSD17B10	ZWILCH	SCD	FAM149B1
	45	LYN	CLCN4	NPM1	ABLIM1	GPR65
	46	MAP2K7	FERMT2	HNRNPAB	PIK3IP1	WDTC1
	47	COMMD9	CFHR2	CAPZA2	APOBEC3H	NME7
	48	TRAF3	PLOD1	CHUK	RPL3	FCGR2A
	49	SH3BP5	NOX4	KIAA0100	PVALB	NCAPG2
	50	PER2	P2RX7	STRAP	LGMN	GUF1
