# Supplementary material for: Identification of Subtype Specific miRNA-mRNA Functional Regulatory Modules in Matched miRNA-mRNA Expression Data: Multiple Myeloma as a Case
Source: Biomed Res Int. 2015 Mar 19;2015:501262. doi: 10.1155/2015/501262 (PMC4385567; doi:10.1155/2015/501262)
Supplement: Supplementary file 1 — Figure S1. Schematic representation of a co-module. The expression values of miRNAs and mRNAs were indicated by a color code ranging from green (under-expressed) to red (over-expressed). Note that in this co-module, two samples of t(4;14) exhibited similar profiles, whereas the sample of t(14;16) exhibited an inverse profile. Figure S2. Distribution of the number of MFRMs extracted from each co-module. Table S1. 72 MM associated genes from OMIM, CGP and GAD. Table S2. 63 MM associated GO biological processes. Table S3. The top 15 miRNAs and 50 mRNAs frequently included in each kind of subtype specific MFRM. [file 501262.f1.zip › 501262.f1/The five MFRMs discussed in paper/miRNA1121_2.txt]

hsa-let-7a
hsa-miR-125a
hsa-miR-145
hsa-miR-146a
hsa-miR-153
hsa-miR-15b
hsa-miR-181c
hsa-miR-184
hsa-miR-193a
hsa-miR-193b
hsa-miR-196a
hsa-miR-196b
hsa-miR-200a
hsa-miR-203
hsa-miR-214
hsa-miR-218
hsa-miR-25
hsa-miR-26a
hsa-miR-26b
hsa-miR-30e-5p
hsa-miR-324-3p
hsa-miR-339
hsa-miR-34a
hsa-miR-361
hsa-miR-378
hsa-miR-379
hsa-miR-383
hsa-miR-423
hsa-miR-433
hsa-miR-449
hsa-miR-449b
hsa-miR-494
hsa-miR-520c
hsa-miR-520f
hsa-miR-548b
hsa-miR-551b
hsa-miR-566
hsa-miR-576
hsa-miR-627
hsa-miR-642
hsa-miR-9
