# Supplementary material for: Identification of Subtype Specific miRNA-mRNA Functional Regulatory Modules in Matched miRNA-mRNA Expression Data: Multiple Myeloma as a Case
Source: Biomed Res Int. 2015 Mar 19;2015:501262. doi: 10.1155/2015/501262 (PMC4385567; doi:10.1155/2015/501262)
Supplement: Supplementary file 1 — Figure S1. Schematic representation of a co-module. The expression values of miRNAs and mRNAs were indicated by a color code ranging from green (under-expressed) to red (over-expressed). Note that in this co-module, two samples of t(4;14) exhibited similar profiles, whereas the sample of t(14;16) exhibited an inverse profile. Figure S2. Distribution of the number of MFRMs extracted from each co-module. Table S1. 72 MM associated genes from OMIM, CGP and GAD. Table S2. 63 MM associated GO biological processes. Table S3. The top 15 miRNAs and 50 mRNAs frequently included in each kind of subtype specific MFRM. [file 501262.f1.zip › 501262.f1/The five MFRMs discussed in paper/miRNA1649_2.txt]

hsa-let-7e
hsa-miR-125a
hsa-miR-130a
hsa-miR-143
hsa-miR-193b
hsa-miR-196b
hsa-miR-199a
hsa-miR-200a
hsa-miR-222
hsa-miR-25
hsa-miR-338
hsa-miR-361
hsa-miR-422b
hsa-miR-423
hsa-miR-501
hsa-miR-518c
hsa-miR-556
hsa-miR-579
hsa-miR-596
hsa-miR-9
hsa-miR-96
