# Supplementary material for: Identification of Subtype Specific miRNA-mRNA Functional Regulatory Modules in Matched miRNA-mRNA Expression Data: Multiple Myeloma as a Case
Source: Biomed Res Int. 2015 Mar 19;2015:501262. doi: 10.1155/2015/501262 (PMC4385567; doi:10.1155/2015/501262)
Supplement: Supplementary file 1 — Figure S1. Schematic representation of a co-module. The expression values of miRNAs and mRNAs were indicated by a color code ranging from green (under-expressed) to red (over-expressed). Note that in this co-module, two samples of t(4;14) exhibited similar profiles, whereas the sample of t(14;16) exhibited an inverse profile. Figure S2. Distribution of the number of MFRMs extracted from each co-module. Table S1. 72 MM associated genes from OMIM, CGP and GAD. Table S2. 63 MM associated GO biological processes. Table S3. The top 15 miRNAs and 50 mRNAs frequently included in each kind of subtype specific MFRM. [file 501262.f1.zip › 501262.f1/The five MFRMs discussed in paper/mRNA1121_2.txt]

ENSG00000001036
ENSG00000001461
ENSG00000001629
ENSG00000001630
ENSG00000002933
ENSG00000005471
ENSG00000005955
ENSG00000006327
ENSG00000006451
ENSG00000006607
ENSG00000008083
ENSG00000008405
ENSG00000009307
ENSG00000010244
ENSG00000010671
ENSG00000011566
ENSG00000012660
ENSG00000012779
ENSG00000012817
ENSG00000012983
ENSG00000014216
ENSG00000014919
ENSG00000015133
ENSG00000015285
ENSG00000015676
ENSG00000016864
ENSG00000023445
ENSG00000023572
ENSG00000025293
ENSG00000027869
ENSG00000030110
ENSG00000034152
ENSG00000039650
ENSG00000040933
ENSG00000043514
ENSG00000044115
ENSG00000054796
ENSG00000055609
ENSG00000057468
ENSG00000059573
ENSG00000059588
ENSG00000060642
ENSG00000061676
ENSG00000061936
ENSG00000062194
ENSG00000064042
ENSG00000064703
ENSG00000064995
ENSG00000065060
ENSG00000065135
ENSG00000065243
ENSG00000065548
ENSG00000065613
ENSG00000065675
ENSG00000065883
ENSG00000066135
ENSG00000066557
ENSG00000068028
ENSG00000068078
ENSG00000068079
ENSG00000068305
ENSG00000068308
ENSG00000068796
ENSG00000068971
ENSG00000070214
ENSG00000070540
ENSG00000070785
ENSG00000070831
ENSG00000072062
ENSG00000072506
ENSG00000072682
ENSG00000073754
ENSG00000073756
ENSG00000073792
ENSG00000074370
ENSG00000077150
ENSG00000077348
ENSG00000078401
ENSG00000078596
ENSG00000079277
ENSG00000079805
ENSG00000080189
ENSG00000081177
ENSG00000081818
ENSG00000082515
ENSG00000083123
ENSG00000083799
ENSG00000084453
ENSG00000084463
ENSG00000085185
ENSG00000085449
ENSG00000085978
ENSG00000085998
ENSG00000086475
ENSG00000086848
ENSG00000088756
ENSG00000088888
ENSG00000089737
ENSG00000090530
ENSG00000090674
ENSG00000090861
ENSG00000090920
ENSG00000092377
ENSG00000092929
ENSG00000092969
ENSG00000095059
ENSG00000095794
ENSG00000096384
ENSG00000097033
ENSG00000099399
ENSG00000099749
ENSG00000099849
ENSG00000099860
ENSG00000100154
ENSG00000100221
ENSG00000100281
ENSG00000100290
ENSG00000100347
ENSG00000100350
ENSG00000100359
ENSG00000100425
ENSG00000100450
ENSG00000100453
ENSG00000100483
ENSG00000100532
ENSG00000100629
ENSG00000100647
ENSG00000100714
ENSG00000100811
ENSG00000100906
ENSG00000100934
ENSG00000101132
ENSG00000101160
ENSG00000101347
ENSG00000101413
ENSG00000101421
ENSG00000101464
ENSG00000101544
ENSG00000101654
ENSG00000101745
ENSG00000102225
ENSG00000102309
ENSG00000102471
ENSG00000102891
ENSG00000103089
ENSG00000103426
ENSG00000103490
ENSG00000103502
ENSG00000103550
ENSG00000104081
ENSG00000104635
ENSG00000104723
ENSG00000104774
ENSG00000104823
ENSG00000104833
ENSG00000104856
ENSG00000104889
ENSG00000105287
ENSG00000105339
ENSG00000105483
ENSG00000105516
ENSG00000105607
ENSG00000105617
ENSG00000105835
ENSG00000105889
ENSG00000106012
ENSG00000106392
ENSG00000106415
ENSG00000106477
ENSG00000106541
ENSG00000106588
ENSG00000106603
ENSG00000106635
ENSG00000106733
ENSG00000107099
ENSG00000107341
ENSG00000107789
ENSG00000107929
ENSG00000108176
ENSG00000108187
ENSG00000108528
ENSG00000108784
ENSG00000108846
ENSG00000108946
ENSG00000109066
ENSG00000109113
ENSG00000109158
ENSG00000109320
ENSG00000109819
ENSG00000109911
ENSG00000110002
ENSG00000110057
ENSG00000110395
ENSG00000110514
ENSG00000110660
ENSG00000110871
ENSG00000111011
ENSG00000111252
ENSG00000111335
ENSG00000111404
ENSG00000111846
ENSG00000112149
ENSG00000112200
ENSG00000112208
ENSG00000112511
ENSG00000112799
ENSG00000112855
ENSG00000113013
ENSG00000113068
ENSG00000113327
ENSG00000113575
ENSG00000113580
ENSG00000113712
ENSG00000113812
ENSG00000113889
ENSG00000114251
ENSG00000114416
ENSG00000114455
ENSG00000114529
ENSG00000114735
ENSG00000114993
ENSG00000115274
ENSG00000115520
ENSG00000115884
ENSG00000115977
ENSG00000116133
ENSG00000116191
ENSG00000116218
ENSG00000116260
ENSG00000116288
ENSG00000116514
ENSG00000116539
ENSG00000116604
ENSG00000116670
ENSG00000116675
ENSG00000116698
ENSG00000116711
ENSG00000116731
ENSG00000116747
ENSG00000116752
ENSG00000116786
ENSG00000116954
ENSG00000117036
ENSG00000117133
ENSG00000117143
ENSG00000117153
ENSG00000117281
ENSG00000117408
ENSG00000117500
ENSG00000117569
ENSG00000118200
ENSG00000118263
ENSG00000118292
ENSG00000118503
ENSG00000118961
ENSG00000119048
ENSG00000119383
ENSG00000119638
ENSG00000119950
ENSG00000120063
ENSG00000120235
ENSG00000120278
ENSG00000120327
ENSG00000120337
ENSG00000120451
ENSG00000120705
ENSG00000120910
ENSG00000120948
ENSG00000121031
ENSG00000121104
ENSG00000121281
ENSG00000121807
ENSG00000121858
ENSG00000122085
ENSG00000122140
ENSG00000122188
ENSG00000122359
ENSG00000122406
ENSG00000122420
ENSG00000122481
ENSG00000122482
ENSG00000122641
ENSG00000122884
ENSG00000123908
ENSG00000124126
ENSG00000124134
ENSG00000124145
ENSG00000124574
ENSG00000124688
ENSG00000124762
ENSG00000125354
ENSG00000125434
ENSG00000125637
ENSG00000125823
ENSG00000125869
ENSG00000125871
ENSG00000125971
ENSG00000126353
ENSG00000126524
ENSG00000126860
ENSG00000127226
ENSG00000127328
ENSG00000127399
ENSG00000127530
ENSG00000127688
ENSG00000127720
ENSG00000127884
ENSG00000128045
ENSG00000128245
ENSG00000128394
ENSG00000128989
ENSG00000129071
ENSG00000129515
ENSG00000130165
ENSG00000130383
ENSG00000130528
ENSG00000130561
ENSG00000130787
ENSG00000131351
ENSG00000131508
ENSG00000131791
ENSG00000131885
ENSG00000132326
ENSG00000132432
ENSG00000132464
ENSG00000132465
ENSG00000132507
ENSG00000132510
ENSG00000132635
ENSG00000132640
ENSG00000132680
ENSG00000132906
ENSG00000133136
ENSG00000133226
ENSG00000133243
ENSG00000133275
ENSG00000133640
ENSG00000133895
ENSG00000134248
ENSG00000134352
ENSG00000134371
ENSG00000134748
ENSG00000134873
ENSG00000134970
ENSG00000135063
ENSG00000135439
ENSG00000135801
ENSG00000135823
ENSG00000135829
ENSG00000136205
ENSG00000136250
ENSG00000136271
ENSG00000136280
ENSG00000136305
ENSG00000136478
ENSG00000136536
ENSG00000136630
ENSG00000136710
ENSG00000136960
ENSG00000137166
ENSG00000137185
ENSG00000137216
ENSG00000137274
ENSG00000137275
ENSG00000137331
ENSG00000137434
ENSG00000137491
ENSG00000137571
ENSG00000137752
ENSG00000137817
ENSG00000137947
ENSG00000138073
ENSG00000138443
ENSG00000138468
ENSG00000138495
ENSG00000138623
ENSG00000138669
ENSG00000138760
ENSG00000138768
ENSG00000138834
ENSG00000139112
ENSG00000139146
ENSG00000139197
ENSG00000139826
ENSG00000140153
ENSG00000140320
ENSG00000140367
ENSG00000140403
ENSG00000140543
ENSG00000140632
ENSG00000140688
ENSG00000140993
ENSG00000141002
ENSG00000141179
ENSG00000141469
ENSG00000141564
ENSG00000141959
ENSG00000141968
ENSG00000141985
ENSG00000142583
ENSG00000142798
ENSG00000143157
ENSG00000143179
ENSG00000143195
ENSG00000143207
ENSG00000143248
ENSG00000143319
ENSG00000143321
ENSG00000143324
ENSG00000143384
ENSG00000143409
ENSG00000143514
ENSG00000143545
ENSG00000143549
ENSG00000143621
ENSG00000143631
ENSG00000143753
ENSG00000143801
ENSG00000143811
ENSG00000143951
ENSG00000144136
ENSG00000144233
ENSG00000144566
ENSG00000144746
ENSG00000144893
ENSG00000144935
ENSG00000144959
ENSG00000145050
ENSG00000145198
ENSG00000145246
ENSG00000145331
ENSG00000145391
ENSG00000145642
ENSG00000145723
ENSG00000145901
ENSG00000145920
ENSG00000145990
ENSG00000146112
ENSG00000147183
ENSG00000147256
ENSG00000147457
ENSG00000147889
ENSG00000148110
ENSG00000148334
ENSG00000148339
ENSG00000148803
ENSG00000148814
ENSG00000148840
ENSG00000149269
ENSG00000149658
ENSG00000150076
ENSG00000150433
ENSG00000150456
ENSG00000150681
ENSG00000151491
ENSG00000151500
ENSG00000151503
ENSG00000151575
ENSG00000151692
ENSG00000151748
ENSG00000152214
ENSG00000152242
ENSG00000152266
ENSG00000152382
ENSG00000152439
ENSG00000152484
ENSG00000152689
ENSG00000152818
ENSG00000153006
ENSG00000153093
ENSG00000153113
ENSG00000153253
ENSG00000153551
ENSG00000153790
ENSG00000153815
ENSG00000154027
ENSG00000154229
ENSG00000154263
ENSG00000154589
ENSG00000154640
ENSG00000154645
ENSG00000154654
ENSG00000154832
ENSG00000155016
ENSG00000155329
ENSG00000155380
ENSG00000155508
ENSG00000155744
ENSG00000155849
ENSG00000155926
ENSG00000155980
ENSG00000156030
ENSG00000156172
ENSG00000156232
ENSG00000156298
ENSG00000156639
ENSG00000156671
ENSG00000156875
ENSG00000156990
ENSG00000157216
ENSG00000157916
ENSG00000158528
ENSG00000158604
ENSG00000158710
ENSG00000158769
ENSG00000159128
ENSG00000159212
ENSG00000159314
ENSG00000159885
ENSG00000160211
ENSG00000160410
ENSG00000160714
ENSG00000160789
ENSG00000160862
ENSG00000160972
ENSG00000160991
ENSG00000160993
ENSG00000161551
ENSG00000161618
ENSG00000161920
ENSG00000161980
ENSG00000162139
ENSG00000162337
ENSG00000162385
ENSG00000162413
ENSG00000162419
ENSG00000162669
ENSG00000162670
ENSG00000162734
ENSG00000162814
ENSG00000162972
ENSG00000163006
ENSG00000163156
ENSG00000163216
ENSG00000163251
ENSG00000163285
ENSG00000163374
ENSG00000163519
ENSG00000163602
ENSG00000163618
ENSG00000163626
ENSG00000163632
ENSG00000163811
ENSG00000163900
ENSG00000164054
ENSG00000164062
ENSG00000164116
ENSG00000164171
ENSG00000164244
ENSG00000164308
ENSG00000164334
ENSG00000164338
ENSG00000164362
ENSG00000164463
ENSG00000164818
ENSG00000164825
ENSG00000164830
ENSG00000164880
ENSG00000164896
ENSG00000164898
ENSG00000165023
ENSG00000165029
ENSG00000165197
ENSG00000165410
ENSG00000165475
ENSG00000165609
ENSG00000165626
ENSG00000165672
ENSG00000165732
ENSG00000165801
ENSG00000165841
ENSG00000165879
ENSG00000165899
ENSG00000166135
ENSG00000166394
ENSG00000166435
ENSG00000166548
ENSG00000166762
ENSG00000166793
ENSG00000166840
ENSG00000166900
ENSG00000166949
ENSG00000166986
ENSG00000167130
ENSG00000167220
ENSG00000167383
ENSG00000167550
ENSG00000167797
ENSG00000168000
ENSG00000168002
ENSG00000168116
ENSG00000168175
ENSG00000168300
ENSG00000168310
ENSG00000168439
ENSG00000168546
ENSG00000168597
ENSG00000168743
ENSG00000168884
ENSG00000169047
ENSG00000169427
ENSG00000169435
ENSG00000169504
ENSG00000169550
ENSG00000169727
ENSG00000169758
ENSG00000169871
ENSG00000169905
ENSG00000170085
ENSG00000170236
ENSG00000170345
ENSG00000170365
ENSG00000170379
ENSG00000170421
ENSG00000170476
ENSG00000170542
ENSG00000170545
ENSG00000170581
ENSG00000170779
ENSG00000171053
ENSG00000171067
ENSG00000171209
ENSG00000171453
ENSG00000171462
ENSG00000171483
ENSG00000171763
ENSG00000171865
ENSG00000171951
ENSG00000172058
ENSG00000172146
ENSG00000172260
ENSG00000172345
ENSG00000172375
ENSG00000172551
ENSG00000172572
ENSG00000172613
ENSG00000172663
ENSG00000172738
ENSG00000173020
ENSG00000173039
ENSG00000173157
ENSG00000173389
ENSG00000173432
ENSG00000173545
ENSG00000173890
ENSG00000173992
ENSG00000174021
ENSG00000174238
ENSG00000174453
ENSG00000174485
ENSG00000174607
ENSG00000174796
ENSG00000174807
ENSG00000175063
ENSG00000175104
ENSG00000175416
ENSG00000175482
ENSG00000175567
ENSG00000175634
ENSG00000175727
ENSG00000175899
ENSG00000175984
ENSG00000176386
ENSG00000176407
ENSG00000176495
ENSG00000176623
ENSG00000176697
ENSG00000177034
ENSG00000177156
ENSG00000177409
ENSG00000177556
ENSG00000177689
ENSG00000177879
ENSG00000177951
ENSG00000178021
ENSG00000178074
ENSG00000178209
ENSG00000178252
ENSG00000178409
ENSG00000178562
ENSG00000178586
ENSG00000178795
ENSG00000178852
ENSG00000178927
ENSG00000179059
ENSG00000179104
ENSG00000179115
ENSG00000179172
ENSG00000179213
ENSG00000179241
ENSG00000179262
ENSG00000179715
ENSG00000180228
ENSG00000180353
ENSG00000180543
ENSG00000180720
ENSG00000181038
ENSG00000181789
ENSG00000181903
ENSG00000182054
ENSG00000182247
ENSG00000182919
ENSG00000183010
ENSG00000183283
ENSG00000183741
ENSG00000183742
ENSG00000184227
ENSG00000184349
ENSG00000184351
ENSG00000184494
ENSG00000184508
ENSG00000184613
ENSG00000184672
ENSG00000185028
ENSG00000185130
ENSG00000185436
ENSG00000185475
ENSG00000185652
ENSG00000185862
ENSG00000185875
ENSG00000185885
ENSG00000185920
ENSG00000186074
ENSG00000186086
ENSG00000186130
ENSG00000186283
ENSG00000186635
ENSG00000186831
ENSG00000187667
ENSG00000187699
ENSG00000187733
ENSG00000187764
ENSG00000188175
ENSG00000188321
ENSG00000188352
ENSG00000188687
ENSG00000188868
ENSG00000189037
ENSG00000189108
ENSG00000189339
ENSG00000189430
ENSG00000196110
ENSG00000196159
ENSG00000196305
ENSG00000196312
ENSG00000196352
ENSG00000196367
ENSG00000196440
ENSG00000196482
ENSG00000196678
ENSG00000196715
ENSG00000196782
ENSG00000196850
ENSG00000196866
ENSG00000196954
ENSG00000196961
ENSG00000197025
ENSG00000197045
ENSG00000197142
ENSG00000197172
ENSG00000197263
ENSG00000197329
ENSG00000197409
ENSG00000197747
ENSG00000197846
ENSG00000197992
ENSG00000198093
ENSG00000198298
ENSG00000198300
ENSG00000198692
ENSG00000198755
ENSG00000198792
ENSG00000198815
ENSG00000198924
ENSG00000198964
ENSG00000203785
ENSG00000203835
ENSG00000204104
ENSG00000204248
ENSG00000204304
ENSG00000204444
ENSG00000204516
ENSG00000204599
ENSG00000204947
ENSG00000205021
ENSG00000205155
ENSG00000205323
ENSG00000205527
ENSG00000205572
ENSG00000205629
ENSG00000205744
ENSG00000205929
ENSG00000206150
ENSG00000206290
ENSG00000206314
ENSG00000206340
ENSG00000206409
ENSG00000206412
ENSG00000206418
ENSG00000206478
ENSG00000206481
ENSG00000206484
ENSG00000206485
ENSG00000206490
ENSG00000206562
ENSG00000211625
ENSG00000211632
ENSG00000211640
ENSG00000212747
ENSG00000212907
ENSG00000213006
ENSG00000213047
ENSG00000213085
ENSG00000213281
ENSG00000213402
ENSG00000213463
ENSG00000213654
ENSG00000213762
ENSG00000213859
ENSG00000213918
ENSG00000214046
ENSG00000214262
ENSG00000217128
ENSG00000221834
ENSG00000221944
ENSG00000221947
ENSG00000221989
ENSG00000223957
ENSG00000224051
ENSG00000224587
ENSG00000224952
ENSG00000225060
ENSG00000225553
ENSG00000225589
ENSG00000226215
ENSG00000226437
ENSG00000227129
ENSG00000227231
ENSG00000227315
ENSG00000227746
ENSG00000227772
ENSG00000228267
ENSG00000228325
ENSG00000228454
ENSG00000228691
ENSG00000228854
ENSG00000228867
ENSG00000228875
ENSG00000229450
ENSG00000229470
ENSG00000229644
ENSG00000229929
ENSG00000230141
ENSG00000230341
ENSG00000230930
ENSG00000231129
ENSG00000231135
ENSG00000231179
ENSG00000231247
ENSG00000231372
ENSG00000231850
ENSG00000231974
ENSG00000232143
ENSG00000232169
ENSG00000232839
ENSG00000232962
ENSG00000233094
ENSG00000233490
ENSG00000234000
ENSG00000234012
ENSG00000234218
ENSG00000234337
ENSG00000234508
ENSG00000234809
ENSG00000234846
ENSG00000235030
ENSG00000235708
ENSG00000235773
ENSG00000235896
ENSG00000235986
ENSG00000236270
ENSG00000236342
ENSG00000236353
ENSG00000236625
ENSG00000236699
ENSG00000236843
ENSG00000237155
ENSG00000237763
ENSG00000238166
ENSG00000239697
ENSG00000239732
ENSG00000240038
ENSG00000240053
ENSG00000240771
ENSG00000241127
ENSG00000241132
ENSG00000241465
ENSG00000241839
ENSG00000243063
ENSG00000244094
ENSG00000244187
ENSG00000244207
ENSG00000244437
ENSG00000244672
ENSG00000244731
ENSG00000249158
ENSG00000250317
ENSG00000250349
ENSG00000251201
ENSG00000251503
ENSG00000253626
ENSG00000253669
