# Supplementary material for: Identification of Subtype Specific miRNA-mRNA Functional Regulatory Modules in Matched miRNA-mRNA Expression Data: Multiple Myeloma as a Case
Source: Biomed Res Int. 2015 Mar 19;2015:501262. doi: 10.1155/2015/501262 (PMC4385567; doi:10.1155/2015/501262)
Supplement: Supplementary file 1 — Figure S1. Schematic representation of a co-module. The expression values of miRNAs and mRNAs were indicated by a color code ranging from green (under-expressed) to red (over-expressed). Note that in this co-module, two samples of t(4;14) exhibited similar profiles, whereas the sample of t(14;16) exhibited an inverse profile. Figure S2. Distribution of the number of MFRMs extracted from each co-module. Table S1. 72 MM associated genes from OMIM, CGP and GAD. Table S2. 63 MM associated GO biological processes. Table S3. The top 15 miRNAs and 50 mRNAs frequently included in each kind of subtype specific MFRM. [file 501262.f1.zip › 501262.f1/The five MFRMs discussed in paper/mRNA1649_2.txt]

ENSG00000006453
ENSG00000011275
ENSG00000011523
ENSG00000020577
ENSG00000023041
ENSG00000026297
ENSG00000027869
ENSG00000034693
ENSG00000046653
ENSG00000054611
ENSG00000056736
ENSG00000066651
ENSG00000070190
ENSG00000072134
ENSG00000074416
ENSG00000076043
ENSG00000078081
ENSG00000078618
ENSG00000083544
ENSG00000085741
ENSG00000089775
ENSG00000090530
ENSG00000091129
ENSG00000091972
ENSG00000092964
ENSG00000092969
ENSG00000099204
ENSG00000099399
ENSG00000100362
ENSG00000101493
ENSG00000102554
ENSG00000103241
ENSG00000104313
ENSG00000104369
ENSG00000104823
ENSG00000104872
ENSG00000105556
ENSG00000106049
ENSG00000106588
ENSG00000106733
ENSG00000107551
ENSG00000108702
ENSG00000108950
ENSG00000110031
ENSG00000111788
ENSG00000111834
ENSG00000111886
ENSG00000112319
ENSG00000112983
ENSG00000113249
ENSG00000113845
ENSG00000113851
ENSG00000114107
ENSG00000114251
ENSG00000114999
ENSG00000115267
ENSG00000116604
ENSG00000117461
ENSG00000118257
ENSG00000118508
ENSG00000121594
ENSG00000122986
ENSG00000124067
ENSG00000124370
ENSG00000124491
ENSG00000124766
ENSG00000125398
ENSG00000125845
ENSG00000126882
ENSG00000128394
ENSG00000130538
ENSG00000132938
ENSG00000133250
ENSG00000133321
ENSG00000134028
ENSG00000134508
ENSG00000135211
ENSG00000136193
ENSG00000136379
ENSG00000137285
ENSG00000137309
ENSG00000137331
ENSG00000137404
ENSG00000138399
ENSG00000138696
ENSG00000141720
ENSG00000143179
ENSG00000143373
ENSG00000144847
ENSG00000145002
ENSG00000145242
ENSG00000145685
ENSG00000145990
ENSG00000146535
ENSG00000147003
ENSG00000148053
ENSG00000148090
ENSG00000149292
ENSG00000151090
ENSG00000152348
ENSG00000152778
ENSG00000154760
ENSG00000155792
ENSG00000155849
ENSG00000155975
ENSG00000157933
ENSG00000158201
ENSG00000158301
ENSG00000158467
ENSG00000158483
ENSG00000158796
ENSG00000159216
ENSG00000160293
ENSG00000160766
ENSG00000161671
ENSG00000161800
ENSG00000162604
ENSG00000162669
ENSG00000162676
ENSG00000163006
ENSG00000163083
ENSG00000163113
ENSG00000163235
ENSG00000163611
ENSG00000163617
ENSG00000163785
ENSG00000163806
ENSG00000164171
ENSG00000164291
ENSG00000164342
ENSG00000164440
ENSG00000165943
ENSG00000166348
ENSG00000166801
ENSG00000166886
ENSG00000167065
ENSG00000169213
ENSG00000169550
ENSG00000170632
ENSG00000171451
ENSG00000171951
ENSG00000173621
ENSG00000173638
ENSG00000174428
ENSG00000177182
ENSG00000177683
ENSG00000179588
ENSG00000180353
ENSG00000181690
ENSG00000181751
ENSG00000181873
ENSG00000181982
ENSG00000182518
ENSG00000182831
ENSG00000184182
ENSG00000184349
ENSG00000184677
ENSG00000185442
ENSG00000185883
ENSG00000185950
ENSG00000186001
ENSG00000186445
ENSG00000186523
ENSG00000187005
ENSG00000187809
ENSG00000188613
ENSG00000188674
ENSG00000188771
ENSG00000196223
ENSG00000196510
ENSG00000196975
ENSG00000196981
ENSG00000197782
ENSG00000197837
ENSG00000198754
ENSG00000198837
ENSG00000203965
ENSG00000204564
ENSG00000205189
ENSG00000205250
ENSG00000205643
ENSG00000206478
ENSG00000212913
ENSG00000213139
ENSG00000213185
ENSG00000214826
ENSG00000224120
ENSG00000226941
ENSG00000233641
ENSG00000234414
ENSG00000234809
ENSG00000237100
ENSG00000237155
ENSG00000240303
ENSG00000240505
ENSG00000242389
ENSG00000250644
ENSG00000250766
ENSG00000254059
