# Supplementary material for: Identification of Subtype Specific miRNA-mRNA Functional Regulatory Modules in Matched miRNA-mRNA Expression Data: Multiple Myeloma as a Case
Source: Biomed Res Int. 2015 Mar 19;2015:501262. doi: 10.1155/2015/501262 (PMC4385567; doi:10.1155/2015/501262)
Supplement: Supplementary file 1 — Figure S1. Schematic representation of a co-module. The expression values of miRNAs and mRNAs were indicated by a color code ranging from green (under-expressed) to red (over-expressed). Note that in this co-module, two samples of t(4;14) exhibited similar profiles, whereas the sample of t(14;16) exhibited an inverse profile. Figure S2. Distribution of the number of MFRMs extracted from each co-module. Table S1. 72 MM associated genes from OMIM, CGP and GAD. Table S2. 63 MM associated GO biological processes. Table S3. The top 15 miRNAs and 50 mRNAs frequently included in each kind of subtype specific MFRM. [file 501262.f1.zip › 501262.f1/The five MFRMs discussed in paper/mRNA1680_1.txt]

ENSG00000003756
ENSG00000005812
ENSG00000015153
ENSG00000019995
ENSG00000023572
ENSG00000026508
ENSG00000028310
ENSG00000034677
ENSG00000055332
ENSG00000064703
ENSG00000067596
ENSG00000067900
ENSG00000068745
ENSG00000069667
ENSG00000070495
ENSG00000073584
ENSG00000075413
ENSG00000076053
ENSG00000076770
ENSG00000083168
ENSG00000087494
ENSG00000099797
ENSG00000100603
ENSG00000100650
ENSG00000100784
ENSG00000100865
ENSG00000100941
ENSG00000101146
ENSG00000101193
ENSG00000101544
ENSG00000101871
ENSG00000102054
ENSG00000102069
ENSG00000102317
ENSG00000103274
ENSG00000103642
ENSG00000104131
ENSG00000104859
ENSG00000105371
ENSG00000105401
ENSG00000105640
ENSG00000106537
ENSG00000106952
ENSG00000108278
ENSG00000109016
ENSG00000109189
ENSG00000109220
ENSG00000109452
ENSG00000110060
ENSG00000110367
ENSG00000110422
ENSG00000110583
ENSG00000111011
ENSG00000111275
ENSG00000112096
ENSG00000112245
ENSG00000112357
ENSG00000113240
ENSG00000114784
ENSG00000115738
ENSG00000117569
ENSG00000118432
ENSG00000119411
ENSG00000119725
ENSG00000120616
ENSG00000121879
ENSG00000122299
ENSG00000122674
ENSG00000123636
ENSG00000124224
ENSG00000124496
ENSG00000124608
ENSG00000124785
ENSG00000125538
ENSG00000126775
ENSG00000126804
ENSG00000127578
ENSG00000127580
ENSG00000127870
ENSG00000128789
ENSG00000128872
ENSG00000129282
ENSG00000129315
ENSG00000129351
ENSG00000129757
ENSG00000131323
ENSG00000131748
ENSG00000131876
ENSG00000132274
ENSG00000132688
ENSG00000133112
ENSG00000134086
ENSG00000134324
ENSG00000134884
ENSG00000134954
ENSG00000135148
ENSG00000136275
ENSG00000136603
ENSG00000137411
ENSG00000137770
ENSG00000137815
ENSG00000137817
ENSG00000137878
ENSG00000138081
ENSG00000138593
ENSG00000139155
ENSG00000139405
ENSG00000139629
ENSG00000140299
ENSG00000141325
ENSG00000141428
ENSG00000141682
ENSG00000141934
ENSG00000145191
ENSG00000146166
ENSG00000146555
ENSG00000146574
ENSG00000146872
ENSG00000147082
ENSG00000147274
ENSG00000147604
ENSG00000148513
ENSG00000150316
ENSG00000151883
ENSG00000151914
ENSG00000152457
ENSG00000152495
ENSG00000152601
ENSG00000152778
ENSG00000152795
ENSG00000154781
ENSG00000155282
ENSG00000155508
ENSG00000157014
ENSG00000157106
ENSG00000157870
ENSG00000157954
ENSG00000158246
ENSG00000158985
ENSG00000160678
ENSG00000160999
ENSG00000162971
ENSG00000163141
ENSG00000163584
ENSG00000163602
ENSG00000163605
ENSG00000164292
ENSG00000165185
ENSG00000165215
ENSG00000165732
ENSG00000166004
ENSG00000166200
ENSG00000166266
ENSG00000166734
ENSG00000166750
ENSG00000166889
ENSG00000168066
ENSG00000168569
ENSG00000169375
ENSG00000169429
ENSG00000169696
ENSG00000169750
ENSG00000170542
ENSG00000170776
ENSG00000171209
ENSG00000171310
ENSG00000171988
ENSG00000172379
ENSG00000173120
ENSG00000173530
ENSG00000173575
ENSG00000173875
ENSG00000173926
ENSG00000175155
ENSG00000175206
ENSG00000176490
ENSG00000177051
ENSG00000177479
ENSG00000178381
ENSG00000180574
ENSG00000181023
ENSG00000182568
ENSG00000183813
ENSG00000184909
ENSG00000185028
ENSG00000185101
ENSG00000186166
ENSG00000186212
ENSG00000186298
ENSG00000186432
ENSG00000187266
ENSG00000189167
ENSG00000196531
ENSG00000196646
ENSG00000196954
ENSG00000197555
ENSG00000197818
ENSG00000197857
ENSG00000203877
ENSG00000211451
ENSG00000213516
ENSG00000213780
ENSG00000214215
ENSG00000214420
ENSG00000215014
ENSG00000215252
ENSG00000221917
ENSG00000223767
ENSG00000225737
ENSG00000226049
ENSG00000227387
ENSG00000227642
ENSG00000228405
ENSG00000228892
ENSG00000228896
ENSG00000228907
ENSG00000230989
ENSG00000235758
ENSG00000238083
ENSG00000241360
ENSG00000241697
ENSG00000242715
ENSG00000250510
ENSG00000251349
