# Supplementary material for: Identification of Subtype Specific miRNA-mRNA Functional Regulatory Modules in Matched miRNA-mRNA Expression Data: Multiple Myeloma as a Case
Source: Biomed Res Int. 2015 Mar 19;2015:501262. doi: 10.1155/2015/501262 (PMC4385567; doi:10.1155/2015/501262)
Supplement: Supplementary file 1 — Figure S1. Schematic representation of a co-module. The expression values of miRNAs and mRNAs were indicated by a color code ranging from green (under-expressed) to red (over-expressed). Note that in this co-module, two samples of t(4;14) exhibited similar profiles, whereas the sample of t(14;16) exhibited an inverse profile. Figure S2. Distribution of the number of MFRMs extracted from each co-module. Table S1. 72 MM associated genes from OMIM, CGP and GAD. Table S2. 63 MM associated GO biological processes. Table S3. The top 15 miRNAs and 50 mRNAs frequently included in each kind of subtype specific MFRM. [file 501262.f1.zip › 501262.f1/The five MFRMs discussed in paper/mRNA1953_3.txt]

ENSG00000012660
ENSG00000018236
ENSG00000026025
ENSG00000043039
ENSG00000064787
ENSG00000066697
ENSG00000069399
ENSG00000070444
ENSG00000075426
ENSG00000076604
ENSG00000083454
ENSG00000100368
ENSG00000101350
ENSG00000101391
ENSG00000103257
ENSG00000104081
ENSG00000104774
ENSG00000105171
ENSG00000105173
ENSG00000105699
ENSG00000106066
ENSG00000109320
ENSG00000109339
ENSG00000109787
ENSG00000109790
ENSG00000110218
ENSG00000113580
ENSG00000116717
ENSG00000117643
ENSG00000121769
ENSG00000125755
ENSG00000128016
ENSG00000128311
ENSG00000129151
ENSG00000131323
ENSG00000131981
ENSG00000132429
ENSG00000132912
ENSG00000133321
ENSG00000134265
ENSG00000134333
ENSG00000134758
ENSG00000135144
ENSG00000136802
ENSG00000136810
ENSG00000137075
ENSG00000137193
ENSG00000138435
ENSG00000138587
ENSG00000139679
ENSG00000140367
ENSG00000140526
ENSG00000140564
ENSG00000141543
ENSG00000142227
ENSG00000143337
ENSG00000144026
ENSG00000144711
ENSG00000148935
ENSG00000151470
ENSG00000151792
ENSG00000152056
ENSG00000152495
ENSG00000153113
ENSG00000155659
ENSG00000155903
ENSG00000158122
ENSG00000160194
ENSG00000160712
ENSG00000163297
ENSG00000164104
ENSG00000164164
ENSG00000164181
ENSG00000165233
ENSG00000165443
ENSG00000166292
ENSG00000166444
ENSG00000166619
ENSG00000167460
ENSG00000167703
ENSG00000168421
ENSG00000168610
ENSG00000169136
ENSG00000172239
ENSG00000172818
ENSG00000172878
ENSG00000173846
ENSG00000178053
ENSG00000178562
ENSG00000179456
ENSG00000180611
ENSG00000182263
ENSG00000182718
ENSG00000183833
ENSG00000184304
ENSG00000185686
ENSG00000186329
ENSG00000196104
ENSG00000196396
ENSG00000197043
ENSG00000197122
ENSG00000197584
ENSG00000197694
ENSG00000227746
ENSG00000228267
ENSG00000231041
ENSG00000233051
ENSG00000233566
ENSG00000234154
ENSG00000236625
ENSG00000239329
ENSG00000242092
ENSG00000244242
ENSG00000244731
ENSG00000250644
