# Supplementary material for: Identification of Subtype Specific miRNA-mRNA Functional Regulatory Modules in Matched miRNA-mRNA Expression Data: Multiple Myeloma as a Case
Source: Biomed Res Int. 2015 Mar 19;2015:501262. doi: 10.1155/2015/501262 (PMC4385567; doi:10.1155/2015/501262)
Supplement: Supplementary file 1 — Figure S1. Schematic representation of a co-module. The expression values of miRNAs and mRNAs were indicated by a color code ranging from green (under-expressed) to red (over-expressed). Note that in this co-module, two samples of t(4;14) exhibited similar profiles, whereas the sample of t(14;16) exhibited an inverse profile. Figure S2. Distribution of the number of MFRMs extracted from each co-module. Table S1. 72 MM associated genes from OMIM, CGP and GAD. Table S2. 63 MM associated GO biological processes. Table S3. The top 15 miRNAs and 50 mRNAs frequently included in each kind of subtype specific MFRM. [file 501262.f1.zip › 501262.f1/The five MFRMs discussed in paper/mRNA1962_4.txt]

ENSG00000026751
ENSG00000047648
ENSG00000051523
ENSG00000057019
ENSG00000058799
ENSG00000065923
ENSG00000071575
ENSG00000073282
ENSG00000077585
ENSG00000079257
ENSG00000085274
ENSG00000085719
ENSG00000095015
ENSG00000095739
ENSG00000095794
ENSG00000100294
ENSG00000100890
ENSG00000101104
ENSG00000102967
ENSG00000103037
ENSG00000103335
ENSG00000106078
ENSG00000106635
ENSG00000107551
ENSG00000108753
ENSG00000109255
ENSG00000112414
ENSG00000112977
ENSG00000113460
ENSG00000114631
ENSG00000115896
ENSG00000116771
ENSG00000116990
ENSG00000117091
ENSG00000117868
ENSG00000118922
ENSG00000123584
ENSG00000124216
ENSG00000124882
ENSG00000125971
ENSG00000127325
ENSG00000130147
ENSG00000131941
ENSG00000132670
ENSG00000133398
ENSG00000133687
ENSG00000135226
ENSG00000135698
ENSG00000136457
ENSG00000136634
ENSG00000136732
ENSG00000136869
ENSG00000137265
ENSG00000137266
ENSG00000137474
ENSG00000138735
ENSG00000139351
ENSG00000139737
ENSG00000140829
ENSG00000141543
ENSG00000144045
ENSG00000145242
ENSG00000145681
ENSG00000145882
ENSG00000146729
ENSG00000149506
ENSG00000150627
ENSG00000150672
ENSG00000150967
ENSG00000151422
ENSG00000152463
ENSG00000153234
ENSG00000153237
ENSG00000153879
ENSG00000154646
ENSG00000155876
ENSG00000155957
ENSG00000156113
ENSG00000156535
ENSG00000157191
ENSG00000158201
ENSG00000159445
ENSG00000159674
ENSG00000159753
ENSG00000161551
ENSG00000161570
ENSG00000162437
ENSG00000162599
ENSG00000163528
ENSG00000163659
ENSG00000164116
ENSG00000164733
ENSG00000164818
ENSG00000165025
ENSG00000165389
ENSG00000165650
ENSG00000167107
ENSG00000168811
ENSG00000169129
ENSG00000169442
ENSG00000171402
ENSG00000172116
ENSG00000172465
ENSG00000172594
ENSG00000173610
ENSG00000173846
ENSG00000175315
ENSG00000177257
ENSG00000177432
ENSG00000178573
ENSG00000180438
ENSG00000181396
ENSG00000182179
ENSG00000182646
ENSG00000183624
ENSG00000184314
ENSG00000184454
ENSG00000184867
ENSG00000185104
ENSG00000185483
ENSG00000187210
ENSG00000196372
ENSG00000197991
ENSG00000198759
ENSG00000203756
ENSG00000204616
ENSG00000211952
ENSG00000211956
ENSG00000211959
ENSG00000211970
ENSG00000213337
ENSG00000225130
ENSG00000225273
ENSG00000239306
ENSG00000241794
ENSG00000242185
ENSG00000242284
ENSG00000243444
