# Supplementary figures and images for: Identification of Subtype Specific miRNA-mRNA Functional Regulatory Modules in Matched miRNA-mRNA Expression Data: Multiple Myeloma as a Case
Source: Hindawi journal article supplement (doi:10.1155/2015/501262), 2015-01-01

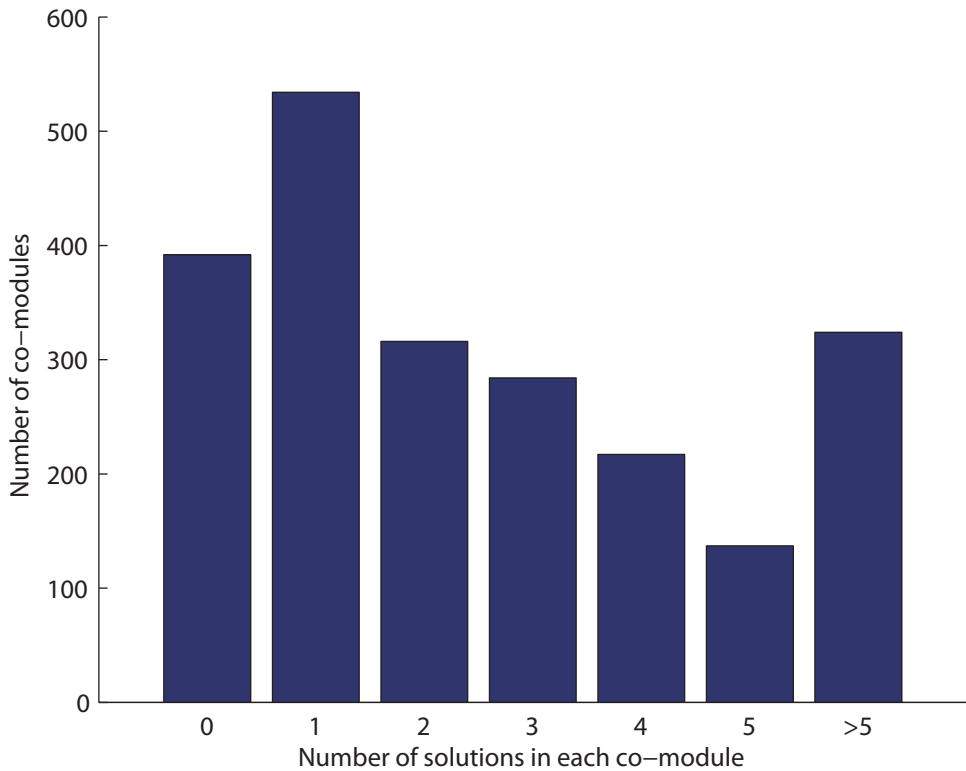

Supplement: f1 [file 501262.f1.zip]

p1375-t(14;16)

p1133-t(4;14)

p744-t(4;14)

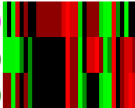

32 miRNAs

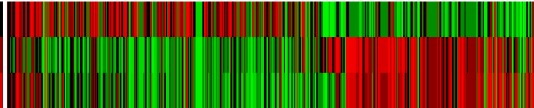

464 mRNAs

Three samples

Supplement: f1 [file 501262.f1.zip]
